# Supplementary material
Source: PubMed Central journal article supplement (PMC6205803)
Supplement: Supp_Table1.pdf [file Supp_Table1.pdf]

## Supplementary Data

SUPPLEMENTARY TABLE S1. CLINICAL CHARACTERISTICS

| <i>Participant</i> | <i>AIS</i> |              |             |             |           |           |
|--------------------|------------|--------------|-------------|-------------|-----------|-----------|
|                    | <i>NLI</i> | <i>Grade</i> | <i>UEMS</i> | <i>LEMS</i> | <i>LT</i> | <i>PP</i> |
| P1                 | T4         | A            | 50          | 0           | 44        | 44        |
| P2                 | T2         | A            | 50          | 0           | 36        | 36        |
| P3                 | T9         | A            | 50          | 2           | 66        | 66        |
| P4                 | T2         | A            | 50          | 0           | 36        | 36        |
| P5                 | C4         | C            | 28          | 0           | 84        | 84        |
| P6                 | T3         | A            | 50          | 0           | 42        | 42        |
| P7                 | C5         | C            | 42          | 13          | 80        | 70        |
| P8                 | T3         | A            | 50          | 0           | 42        | 40        |

NLI, neurological level of injury; AIS, American Spinal Injury Association Impairment Scale classification; UEMS, upper extremity motor score; LEMS, lower extremity motor score; LT light touch; PP, pin prick.
