# Supplementary material
Source: PubMed Central journal article supplement (PMC6205803)
Supplement: Supp_Table2.pdf [file Supp_Table2.pdf]

SUPPLEMENTARY TABLE S2. MEAN EMG ACTIVITY DURING MULTI-DIRECTIONAL LEANING

| <i>EMG (mV) – Forward</i> |                       |             |            |           |           |                    |             |            |           |           |
|---------------------------|-----------------------|-------------|------------|-----------|-----------|--------------------|-------------|------------|-----------|-----------|
| <i>Participant</i>        | <i>No stimulation</i> |             |            |           |           | <i>Stimulation</i> |             |            |           |           |
|                           | <i>E-T7</i>           | <i>E-L3</i> | <i>Obl</i> | <i>RA</i> | <i>RF</i> | <i>E-T7</i>        | <i>E-L3</i> | <i>Obl</i> | <i>RA</i> | <i>RF</i> |
| P1                        | 0.0828                | 0.1158      | 0.1938     | 0.1214    | 0.1835    | 0.1716             | 0.2198      | 0.1049     | 0.0807    | 0.1491    |
| P2                        | 0.0700                | 0.0445      | 0.0602     | 0.5919    | 0.2053    | 0.0358             | 1.9557      | 0.3930     | 0.0552    | 0.2366    |
| P4                        | 0.1026                | 0.0166      | 0.0218     | 0.0512    | 0.0844    | 0.0473             | 0.3598      | 0.1384     | 0.1168    | 0.1035    |
| P5                        | 0.0323                | 0.0401      | 0.0180     | 0.1242    | 0.0728    | 0.2038             | 0.1118      | 0.1114     | 0.2171    | 0.1047    |
| P6                        | 0.1080                | 0.0621      | 0.1290     | 0.1203    | 0.0728    | 0.2038             | 0.1118      | 0.1114     | 0.2171    | 0.1047    |
| P7                        | 0.0557                | 0.0256      | 0.0292     | 0.0364    | 0.0706    | 0.2107             | 0.4081      | 0.2105     | 0.0979    | 0.0753    |
| P8                        | 0.0646                | 0.0152      | 0.0120     | 0.0328    | 0.0234    | 0.0892             | 0.8149      | 0.0907     | 0.1399    | 0.0471    |

  

| <i>EMG (mV) – Backward</i> |                       |             |            |           |           |                    |             |            |           |           |
|----------------------------|-----------------------|-------------|------------|-----------|-----------|--------------------|-------------|------------|-----------|-----------|
| <i>Participant</i>         | <i>No stimulation</i> |             |            |           |           | <i>Stimulation</i> |             |            |           |           |
|                            | <i>E-T7</i>           | <i>E-L3</i> | <i>Obl</i> | <i>RA</i> | <i>RF</i> | <i>E-T7</i>        | <i>E-L3</i> | <i>Obl</i> | <i>RA</i> | <i>RF</i> |
| P1                         | 0.0591                | 0.0812      | 0.1588     | 0.1019    | 0.1541    | 0.1759             | 0.2237      | 0.1202     | 0.0863    | 0.1372    |
| P2                         | 0.0362                | 0.0388      | 0.0193     | 0.0645    | 0.1821    | 0.0405             | 1.9902      | 0.4814     | 0.0245    | 0.2113    |
| P4                         | 0.0595                | 0.0128      | 0.0173     | 0.0379    | 0.1183    | 0.0590             | 0.4147      | 0.1716     | 0.1466    | 0.1405    |
| P5                         | 0.0880                | 0.0446      | 0.0163     | 0.1904    | 0.0721    | 0.2304             | 0.1326      | 0.1414     | 0.2073    | 0.0953    |
| P6                         | 0.0543                | 0.0476      | 0.0951     | 0.0446    | 0.0721    | 0.2304             | 0.1326      | 0.1414     | 0.2073    | 0.0953    |
| P7                         | 0.0484                | 0.0190      | 0.0276     | 0.0540    | 0.0445    | 0.1848             | 0.4133      | 0.2095     | 0.0989    | 0.0662    |
| P8                         | 0.0436                | 0.0060      | 0.0053     | 0.0091    | 0.0108    | 0.0790             | 0.8046      | 0.0988     | 0.1964    | 0.0463    |

  

| <i>EMG (mV) – Right</i> |                       |             |            |           |           |                    |             |            |           |           |
|-------------------------|-----------------------|-------------|------------|-----------|-----------|--------------------|-------------|------------|-----------|-----------|
| <i>Participant</i>      | <i>No stimulation</i> |             |            |           |           | <i>Stimulation</i> |             |            |           |           |
|                         | <i>E-T7</i>           | <i>E-L3</i> | <i>Obl</i> | <i>RA</i> | <i>RF</i> | <i>E-T7</i>        | <i>E-L3</i> | <i>Obl</i> | <i>RA</i> | <i>RF</i> |
| P1                      | 0.0793                | 0.0875      | 0.1519     | 0.1000    | 0.1465    | 0.1682             | 0.2127      | 0.1092     | 0.0785    | 0.1388    |
| P2                      | 0.0680                | 0.0376      | 0.0141     | 0.0716    | 0.1895    | 0.0375             | 1.8866      | 0.5125     | 0.0258    | 0.1686    |
| P4                      | 0.0687                | 0.0114      | 0.0140     | 0.0313    | 0.1138    | 0.0339             | 0.2541      | 0.0875     | 0.0852    | 0.1357    |
| P5                      | 0.0697                | 0.0320      | 0.0158     | 0.1343    | 0.0921    | 0.0780             | 0.1264      | 0.0520     | 0.1908    | 0.1096    |
| P6                      | 0.0527                | 0.0336      | 0.0656     | 0.0639    | 0.0033    | 0.1903             | 0.1264      | 0.0520     | 0.1908    | 0.0241    |
| P7                      | 0.0298                | 0.0184      | 0.0216     | 0.0296    | 0.0494    | 0.1932             | 0.4605      | 0.2129     | 0.1130    | 0.0762    |
| P8                      | 0.1835                | 0.0931      | 0.1129     | 0.1879    | 0.0763    | 0.0701             | 0.6897      | 0.1141     | 0.1340    | 0.0449    |

  

| <i>EMG (mV) – Left</i> |                       |             |            |           |           |                    |             |            |           |           |
|------------------------|-----------------------|-------------|------------|-----------|-----------|--------------------|-------------|------------|-----------|-----------|
| <i>Participant</i>     | <i>No stimulation</i> |             |            |           |           | <i>Stimulation</i> |             |            |           |           |
|                        | <i>E-T7</i>           | <i>E-L3</i> | <i>Obl</i> | <i>RA</i> | <i>RF</i> | <i>E-T7</i>        | <i>E-L3</i> | <i>Obl</i> | <i>RA</i> | <i>RF</i> |
| P1                     | 0.0859                | 0.0843      | 0.1571     | 0.1042    | 0.1539    | 0.1702             | 0.2142      | 0.1043     | 0.0783    | 0.1346    |
| P2                     | 0.0534                | 0.0397      | 0.0217     | 0.0700    | 0.2063    | 0.0349             | 1.7669      | 0.4001     | 0.0606    | 0.2564    |
| P4                     | 0.0754                | 0.0138      | 0.0185     | 0.0391    | 0.1152    | 0.0424             | 0.2996      | 0.1272     | 0.1027    | 0.1472    |
| P5                     | 0.0857                | 0.0349      | 0.0212     | 0.1651    | 0.0831    | 0.1923             | 0.1236      | 0.0519     | 0.1664    | 0.0800    |
| P6                     | 0.1058                | 0.0413      | 0.1189     | 0.0698    | 0.0831    | 0.1923             | 0.1236      | 0.0519     | 0.1664    | 0.0800    |
| P7                     | 0.0816                | 0.0270      | 0.0199     | 0.0306    | 0.0484    | 0.2152             | 0.4426      | 0.2438     | 0.1081    | 0.0682    |
| P8                     | 0.0145                | 0.0027      | 0.0030     | 0.0046    | 0.0061    | 0.0218             | 0.0199      | 0.0241     | 0.0388    | 0.0107    |

EMG, electromyography; E-T7, erector spinae level T7; E-L3, erector spinae level L3; Obl, external obliques; RA, rectus abdominis; RF, rectus femoris.

Note: The EMG data of participant P3 were excluded from the group analysis because of the relatively low, T9 neurological level of SCI.
